# Supplementary material for: A Hydrazine–Hydrazone Adamantine Compound Shows Antimycobacterial Activity and Is a Probable Inhibitor of MmpL3
Source: MDPI journal article supplement (doi:10.3390/molecules27207130), 2022-10-21
Supplement: s1 [file s1]

## Supporting Information

### A hydrazine-hydrazone adamantine compound that target MmpL3 shows antimycobacterial activity

Julien Briffotiaux<sup>1,2\*£</sup>, Yanji Xu<sup>1,2&</sup>, Wei Huang<sup>1,2&</sup>, Zhen Hui<sup>2</sup>, Xiao Wang<sup>1</sup>, Brigitte Gicquel<sup>1,3£</sup>, Shengyuan Liu<sup>1£\*</sup>

<sup>1</sup>Department of Tuberculosis Control and Prevention, Shenzhen Nanshan Center for Chronic Disease Control, 7 Huaming Road, Shenzhen, 518054, China.

<sup>2</sup>Bacteriology & Antibacterial Resistance Surveillance Laboratory, Shenzhen Institute of Respiratory Diseases, Shenzhen People's Hospital (The Second Clinical Medical College, Jinan University; The First Affiliated Hospital, Southern University of Science and Technology), No 1017 Dongmen North Road, Shenzhen, 518020, China.

<sup>3</sup>Mycobacterial Genetics Unit, Institut Pasteur, 25 Rue du Docteur Roux, 75724, Paris, France.

& Equal participation

£ Equal participation

\*Corresponding Authors: Shengyuan Liu liushenglb@126.com  
Julien Briffotiaux julien.briffotiaux@gmail.com

#### Table of contents

|                                                                             |    |
|-----------------------------------------------------------------------------|----|
| Figure S1. Intracellular calibration of the pH-sensitive dye BCECF-AN.      | S2 |
| Figure S2. <sup>1</sup> H-NMR spectrum of compound 1.                       | S2 |
| Figure S3. HPLC trace of compound 1.                                        | S3 |
| Figure S4. The docking site of compound 1 with <i>M. tuberculosis</i> MmpL3 | S3 |
| Table S1. Mutation in rpoB in clinical strains Rif-R used in the study.     | S4 |
| Table S2. Primers used in this study.                                       | S4 |
| Table S3. Molecular formula strings.                                        | S4 |

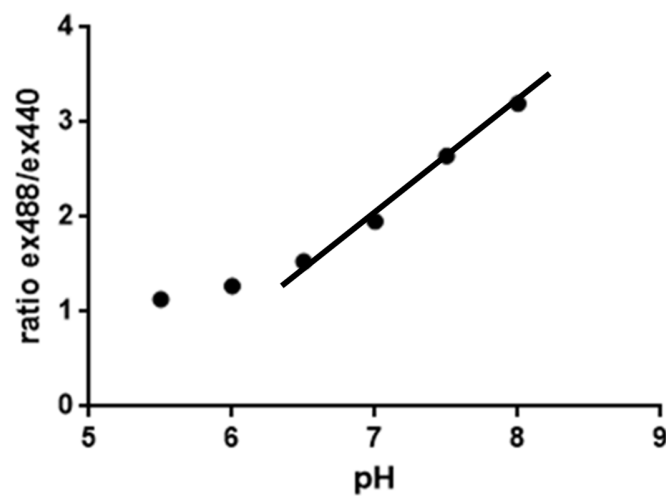

**Figure S1. Intracellular calibration of the pH-sensitive dye BCECF-AN.** Measurements of the fluorescence ratio ( $\lambda_{\text{ex}}$  488 nm/ $\lambda_{\text{ex}}$  440 nm) of BCECF in *M. bovis* BCG were averaged (triplicates). pH calibration curve was sigmoidal with linear range in the physiological pH range of 6,5 - 8.

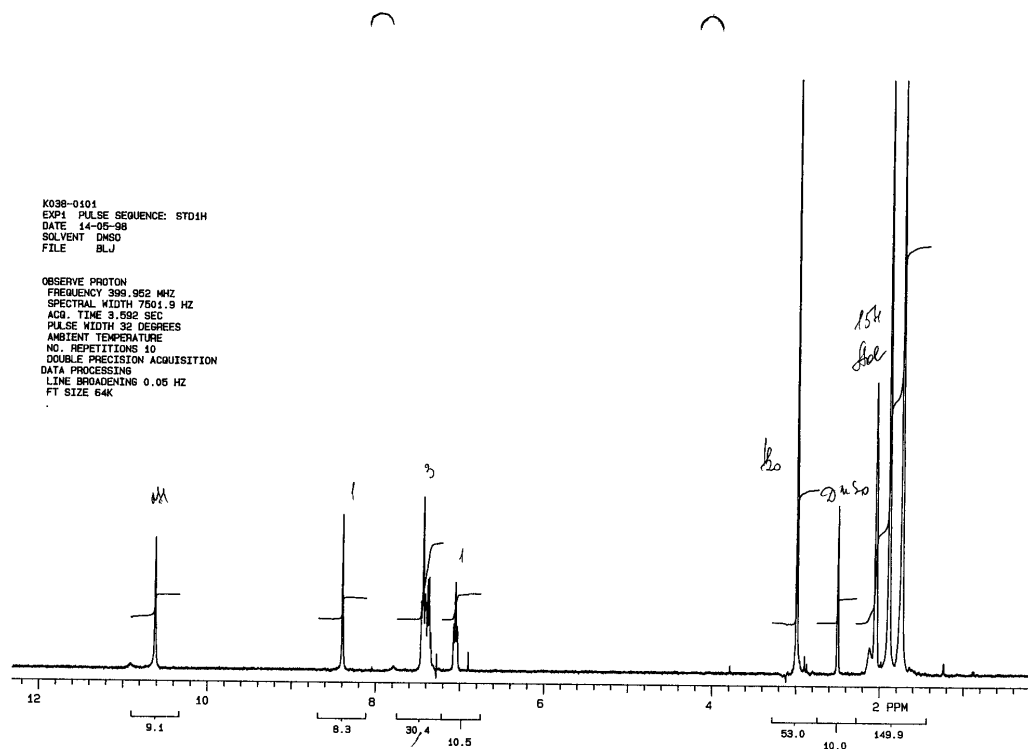

**Figure S2.  $^1\text{H}$ -NMR spectrum of compound 1 (400 MHz).**

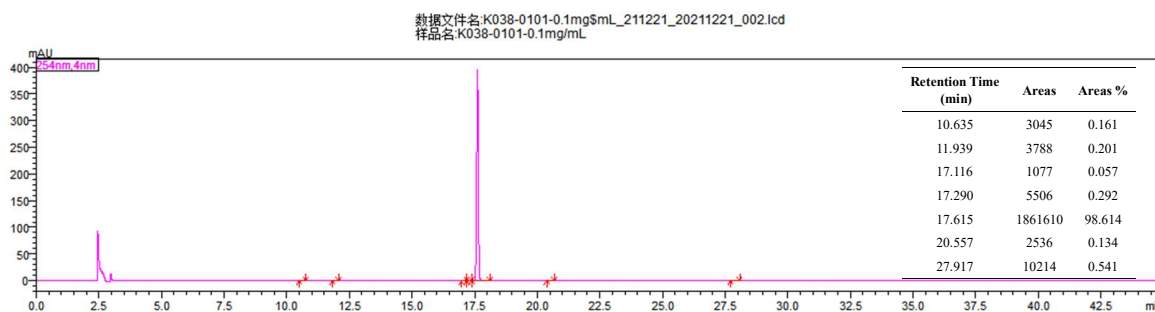

**Figure S3. HPLC trace of compound 1.** The purity of compound 1 is 98.6%. HPLC conditions: Column: Phenomenex Kinetex XB-C18, 5  $\mu$ m, 100 Å, 4.6\*250 mm. Mobile A: acetonitrile, mobile B: 2 mM ammonium formate; gradient: 0-10 min with 10-60 % A, 10-30 min with 60-95 % A, 30-40 min with 95 % A, 40-40.1 min with 95-10 % A, 40.1-45 min with 10 % A. Flow rate: 1 mL/min; column temperature: 35°C; detector: 254 nm; injection volume: 10  $\mu$ L. Sample: 0.1 mg/mL in DMSO.

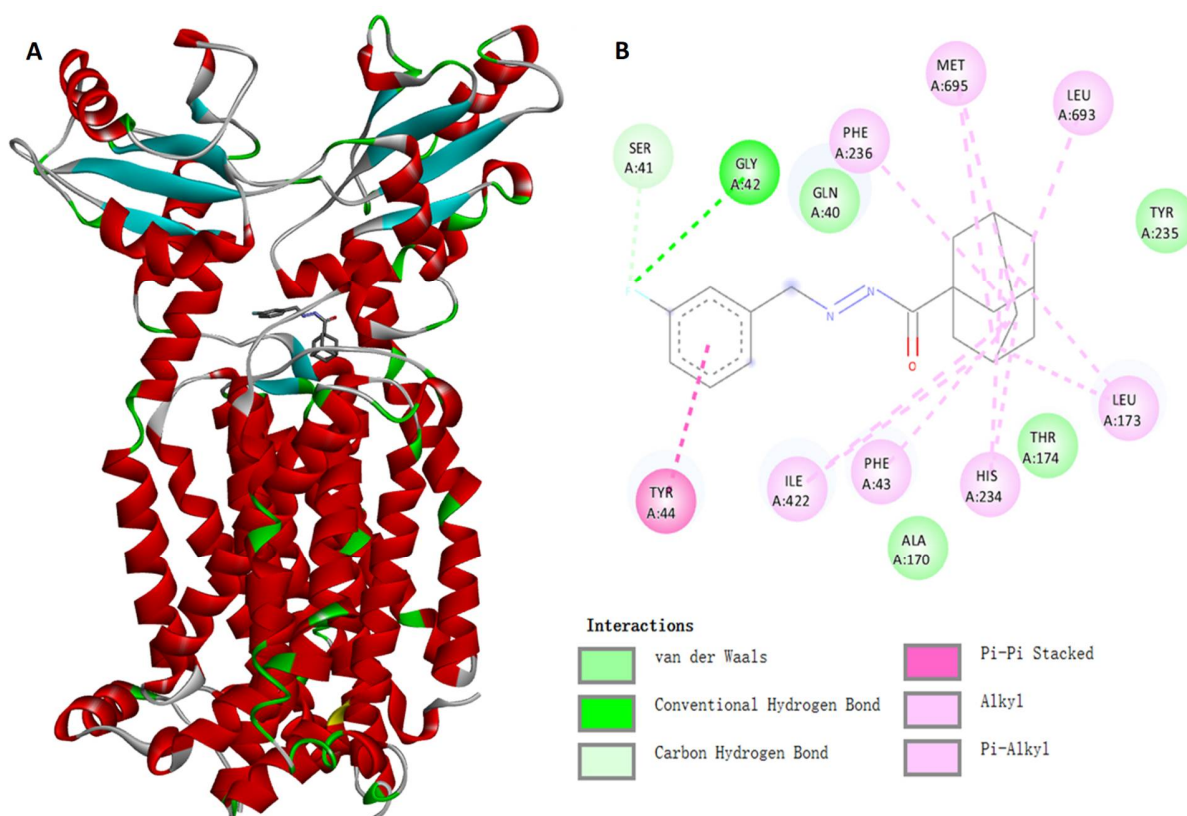

**Figure S4. The docking site of compound 1 with *M. tuberculosis* MmpL3.** A. Representation of an X-ray structure of the *M. tuberculosis* MmpL3 (PDB ID: 7NVH) with docked ligand compound 1 in the cavity of the protein. Compound 1 is depicted in stick representation in grey. B. 2D interaction diagram for the complex MmpL3-compound 1 drawn using Discovery Studio Visualizer.

| Clinical strain | Mutation in <i>rpoB</i> |                      |
|-----------------|-------------------------|----------------------|
|                 | Base                    | Amino Acid           |
| <b>M9</b>       | 1590C>T;1714A>G         | Ser531Leu; Ile572Val |
| <b>M20</b>      | 1590C>T                 | Ser531Leu            |
| <b>M34</b>      | 1598T>C                 | Leu533Pro            |

**Table S1. Mutation in *rpoB* in clinical strains Rif-R used in the study.**

| Primers      | 5' to 3' Sequence   |
|--------------|---------------------|
| MSMEG_0250-F | ccttggagtttgtcgatc  |
| MSMEG_0250-R | cggtaggcattcctcaaca |

**Table S2. Primers used in this study.**

| Compound          | SMILE                                                   | Molecular Formula                                 | Molecular Weight |
|-------------------|---------------------------------------------------------|---------------------------------------------------|------------------|
| <b>Compound 1</b> | <chem>Fc1cccc(c1)/C=N/NC(=O)C12CC3CC(C1)CC(C2)C3</chem> | C <sub>18</sub> H <sub>21</sub> FN <sub>2</sub> O | 300.4            |

**Table S3. Molecular formula strings.**
